# Supplementary material for: Psychopathology in mothers of children with pathogenic Copy Number Variants
Source: PubMed Central journal article supplement (PMC10359584; doi:10.1136/jmg-2022-108752), 2022-11-29
Supplement: jmg-2022-108752supp001.pdf [file jmg-2022-108752supp001.pdf]

**Supplementary table 1.** CNVs of participants' children

| CNV                                           | N         |
|-----------------------------------------------|-----------|
| <b>11q14.1 deletion</b>                       | <b>2</b>  |
| <b>13q12.2 duplication</b>                    | <b>1</b>  |
| <b>15q11.2 deletion</b>                       | <b>22</b> |
| <b>15q11.2 duplication</b>                    | <b>1</b>  |
| <b>15q13.2 duplication</b>                    | <b>2</b>  |
| <b>15q13.3 deletion</b>                       | <b>11</b> |
| <b>15q13.3 duplication</b>                    | <b>10</b> |
| <b>16p11.2 deletion (and distal deletion)</b> | <b>37</b> |
| <b>16p11.2 duplication</b>                    | <b>12</b> |
| <b>16p12.2 deletion</b>                       | <b>2</b>  |
| <b>16p13.11 deletion</b>                      | <b>4</b>  |
| <b>16p13.11 duplication</b>                   | <b>2</b>  |
| <b>1q21.1 deletion</b>                        | <b>13</b> |
| <b>1q21.1 duplication</b>                     | <b>17</b> |
| <b>22q11.2 deletion</b>                       | <b>80</b> |
| <b>22q11.2 duplication</b>                    | <b>19</b> |
| <b>22q12.3 duplication</b>                    | <b>1</b>  |
| <b>22q13.3 deletion</b>                       | <b>2</b>  |
| <b>2p16.3 deletion</b>                        | <b>1</b>  |
| <b>3q29 deletion</b>                          | <b>4</b>  |
| <b>4q28.3</b>                                 | <b>1</b>  |
| <b>7p22.1 deletion</b>                        | <b>1</b>  |
| <b>7q11.23 duplication</b>                    | <b>1</b>  |
| <b>8q12.3 deletion</b>                        | <b>1</b>  |
| <b>9q34.3 deletion</b>                        | <b>10</b> |
| <b>17q23 duplication</b>                      | <b>1</b>  |
| <b>SHANK3 deletion</b>                        | <b>1</b>  |

|                                                                                                         |           |
|---------------------------------------------------------------------------------------------------------|-----------|
| <b>Xp21.1</b>                                                                                           | <b>1</b>  |
| <b>XXXY</b>                                                                                             | <b>1</b>  |
| <b>NRXN1</b>                                                                                            | <b>12</b> |
| We note here the primary CNV for which the family was recruited. 12% of our sample had additional CNVs. |           |
